# Supplementary material
Source: Springer Nature journal article supplement (https://www.springermedizin.de/resource/supplementary/12891_2013_2019_MOESM5_ESM.pdf/9509768)

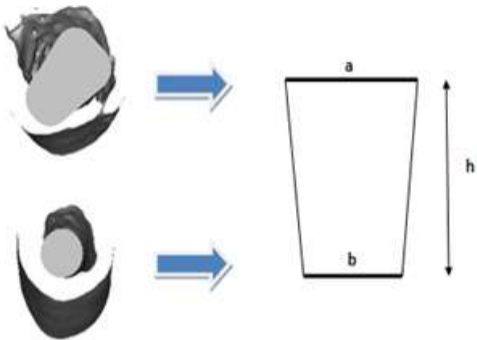

(a)

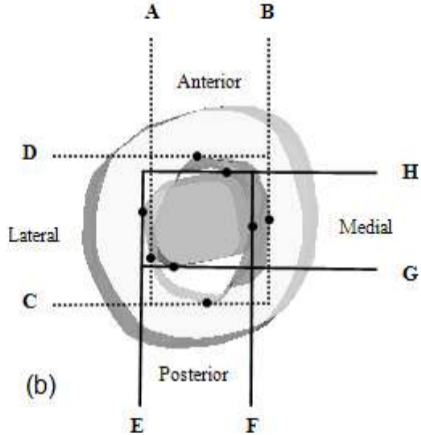

(b)

Supplement: MOESM5 [file 9509768]
